# Supplementary material
Source: PubMed Central journal article supplement (PMC6126613)
Supplement: NIHMS79202-supplement-Supplementary_information.pdf [file NIHMS79202-supplement-Supplementary_information.pdf]

## Supplementary Method 1 - Protein biotinylation

For the immobilization on SA beads, target proteins need to be biotinylated. In general, protein biotinylation can be done either enzymatically or chemically. We routinely use the chemical biotinylation procedure, adapted from the Biotin-NHS manufacturer`s instructions, as described herein. Before and after biotinylation, standard protein quality control assays such as SDS-PAGE and FPLC analysis should be performed. The success of the biotinylation reaction can be assessed using a bandshift assay or, for some proteins, MS analysis.

▲ **CRITICAL** Whenever possible, handle proteins at 4°C or on ice. For storage, snap freeze using liquid nitrogen and place at -80 °C.

- 1| Dissolve 1 mg of protein in 1 ml protein buffer, such as PBS.  
▲ **CRITICAL STEP** Amine-containing buffers like Tris can not be used as protein buffer since amine would react with the biotinylation reagent.
- 2| Prepare a 10 mM solution of EZ-Link NHS-LC-Biotin (Thermo Fisher Scientific).  
▲ **CRITICAL STEP** This solution should be prepared immediately before use. Alternatively, 100 mM stock solutions may be prepared using water-free DMSO and protection with argon.
- 3| Calculate the molar amount of protein. Add a 20-fold molar excess of EZ-Link NHS-LC-Biotin.
- 4| Incubate at 4 °C for 3 h.
- 5| Add Tris-HCl 1 M pH 7.4 to a 10-fold molar excess of Tris.
- 6| Incubate at 4°C for 1 h.
- 7| Purify biotinylated protein using a PD-10 column (GE Healthcare) according to the manufacturer`s instructions. Collect fractions separately.
- 8| Measure OD<sub>280</sub> of all fractions using the Nanodrop spectrophotometer. Pool protein-containing fractions.

# Supplementary Data 1 - Protocol Status Report

23.06.2015 11:21:24+02:00

1

## Laboratory information

|                    |                                      |
|--------------------|--------------------------------------|
| Laboratory name    | Neri Lab                             |
| Laboratory address | Vladimir-Prelog-Weg 3<br>8093 Zurich |
| Phone              | +41 44 633 74 25                     |
| Email              | willy.decurtins@pharma.ethz.ch       |

## Run information

|                   |                                   |
|-------------------|-----------------------------------|
| Protocol name     | 150623_DECL_selection_1_plates1+2 |
| Execution started | 23.06.2015 08:53:20+02:00         |
| Executing user    | admin                             |
| Total warnings    | 0                                 |
| Total errors      | 0                                 |
| Description       |                                   |

## Instrument parameters

|                          |            |
|--------------------------|------------|
| Instrument name          | KingFisher |
| Instrument version       | 1.3.3      |
| Instrument serial number | 700-596    |

## SW Parameters

|                          |                                                |
|--------------------------|------------------------------------------------|
| Run software version     | BindIt Software 3.1 for KingFisher Instruments |
| Current software version | BindIt Software 3.1 for KingFisher Instruments |

## Run Log

23.06.2015 08:53:20+02:00 150623\_DECL\_selection\_1\_plates1+2: started  
23.06.2015 08:53:23+02:00 Tip1: started  
23.06.2015 08:53:23+02:00 Mix plate1 A beads: started  
23.06.2015 09:00:00+02:00 Mix plate1 A beads: completed  
23.06.2015 09:00:00+02:00 Mix plate1 B protein: started  
23.06.2015 09:31:57+02:00 Mix plate1 B protein: completed  
23.06.2015 09:31:57+02:00 Mix plate1 C wash1: started  
23.06.2015 09:37:13+02:00 Mix plate1 C wash1: completed  
23.06.2015 09:37:13+02:00 Mix plate1 D wash2: started  
23.06.2015 09:42:29+02:00 Mix plate1 D wash2: completed  
23.06.2015 09:42:29+02:00 Mix plate1 E wash3: started  
23.06.2015 09:47:45+02:00 Mix plate1 E wash3: completed  
23.06.2015 09:47:45+02:00 Mix plate1 F library: started  
23.06.2015 10:49:41+02:00 Mix plate1 F library: completed  
23.06.2015 10:49:41+02:00 Mix plate1 G wash1: started  
23.06.2015 10:52:27+02:00 Mix plate1 G wash1: completed  
23.06.2015 10:52:27+02:00 Mix plate1 H wash2: started  
23.06.2015 10:55:12+02:00 Mix plate1 H wash2: completed  
23.06.2015 10:55:12+02:00 Mix plate2 A wash3: started  
23.06.2015 10:59:06+02:00 Mix plate2 A wash3: completed  
23.06.2015 10:59:07+02:00 Mix plate2 B wash4: started  
23.06.2015 11:01:52+02:00 Mix plate2 B wash4: completed  
23.06.2015 11:01:52+02:00 Mix plate2 C wash5: started  
23.06.2015 11:04:38+02:00 Mix plate2 C wash5: completed  
23.06.2015 11:04:38+02:00 Mix plate2 D elution: started  
23.06.2015 11:08:13+02:00 Mix plate2 D elution: completed  
23.06.2015 11:08:13+02:00 Tip1: completed  
23.06.2015 11:08:17+02:00 150623\_DECL\_selection\_1\_plates1+2: completed

## Steps Data

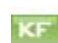

### 150623\_DECL\_selection\_1\_plates1+2

Instrument type  
Kit name  
Description

KingFisher

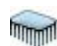

### Tip1

Tip

KingFisher tip comb

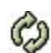

### Mix plate1 A beads

Plate

DECL plate 1 (A) - beads, PBS

Beginning of step:

Precollect

No

Release beads

No

Mixing/pause parameters:

Pause for manual handling

No

1. Mixing time [hh:mm:ss]

00:00:30

1. Mixing speed

Bottom mix

2. Mixing time [hh:mm:ss]

00:00:30

2. Mixing speed

Medium

Loop count

5

End of step:

Postmix

No

Collect count

5

Collect time [s]

10

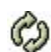

### Mix plate1 B protein

Plate

DECL plate 1 (B) - protein, PBS

Beginning of step:

Precollect

No

Release time [hh:mm:ss]

00:00:30

Release speed

Medium

Mixing/pause parameters:

Pause for manual handling

No

Mixing time [hh:mm:ss]

00:30:00

Mixing speed

Medium

End of step:

Postmix

No

Collect count

5

Collect time [s]

10

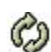

### Mix plate1 C wash1

Plate

DECL plate 1 (C) - wash1, PBST-Biotin

Beginning of step:

Precollect

No

Release time [hh:mm:ss]

00:00:30

Release speed

Medium

Mixing/pause parameters:

Pause for manual handling

No

Mixing time [hh:mm:ss]

00:03:00

Mixing speed

Medium

## ...Mix plate1 C wash1

End of step:  
 Postmix No  
 Collect count 5  
 Collect time [s] 10

## Mix plate1 D wash2

Plate DECL plate 1 (D) - wash2, PBST-Biotin

Beginning of step:  
 Precollect No  
 Release time [hh:mm:ss] 00:00:30  
 Release speed Medium

Mixing/pause parameters:  
 Pause for manual handling No  
 Mixing time [hh:mm:ss] 00:03:00  
 Mixing speed Medium

End of step:  
 Postmix No  
 Collect count 5  
 Collect time [s] 10

## Mix plate1 E wash3

Plate DECL plate 1 (E) - wash3, PBST

Beginning of step:  
 Precollect No  
 Release time [hh:mm:ss] 00:00:30  
 Release speed Medium

Mixing/pause parameters:  
 Pause for manual handling No  
 Mixing time [hh:mm:ss] 00:03:00  
 Mixing speed Medium

End of step:  
 Postmix No  
 Collect count 5  
 Collect time [s] 10

## Mix plate1 F library

Plate DECL plate 1 (F) - library, PBST

Beginning of step:  
 Precollect No  
 Release time [hh:mm:ss] 00:00:30  
 Release speed Medium

Mixing/pause parameters:  
 Pause for manual handling No  
 Mixing time [hh:mm:ss] 01:00:00  
 Mixing speed Medium

End of step:  
 Postmix No  
 Collect count 5  
 Collect time [s] 10

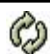

## Mix plate1 G wash1

|                           |                                |
|---------------------------|--------------------------------|
| Plate                     | DECL plate 1 (G) - wash1, PBST |
| Beginning of step:        |                                |
| Precollect                | No                             |
| Release time [hh:mm:ss]   | 00:00:30                       |
| Release speed             | Medium                         |
| Mixing/pause parameters:  |                                |
| Pause for manual handling | No                             |
| Mixing time [hh:mm:ss]    | 00:00:30                       |
| Mixing speed              | Medium                         |
| End of step:              |                                |
| Postmix                   | No                             |
| Collect count             | 5                              |
| Collect time [s]          | 10                             |

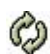

## Mix plate1 H wash2

|                           |                                |
|---------------------------|--------------------------------|
| Plate                     | DECL plate 1 (H) - wash2, PBST |
| Beginning of step:        |                                |
| Precollect                | No                             |
| Release time [hh:mm:ss]   | 00:00:30                       |
| Release speed             | Medium                         |
| Mixing/pause parameters:  |                                |
| Pause for manual handling | No                             |
| Mixing time [hh:mm:ss]    | 00:00:30                       |
| Mixing speed              | Medium                         |
| End of step:              |                                |
| Postmix                   | No                             |
| Collect count             | 5                              |
| Collect time [s]          | 10                             |

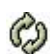

## Mix plate2 A wash3

|                           |                                |
|---------------------------|--------------------------------|
| Plate                     | DECL plate 2 (A) - wash3, PBST |
| Beginning of step:        |                                |
| Precollect                | No                             |
| Release time [hh:mm:ss]   | 00:00:30                       |
| Release speed             | Medium                         |
| Mixing/pause parameters:  |                                |
| Pause for manual handling | No                             |
| Mixing time [hh:mm:ss]    | 00:00:30                       |
| Mixing speed              | Medium                         |
| End of step:              |                                |
| Postmix                   | No                             |
| Collect count             | 5                              |
| Collect time [s]          | 10                             |



## Mix plate2 B wash4

|                          |                                |
|--------------------------|--------------------------------|
| Plate                    | DECL plate 2 (B) - wash4, PBST |
| Beginning of step:       |                                |
| Precollect               | No                             |
| Release time [hh:mm:ss]  | 00:00:30                       |
| Release speed            | Medium                         |
| Mixing/pause parameters: |                                |

## ...Mix plate2 B wash4

|                           |          |
|---------------------------|----------|
| Pause for manual handling | No       |
| Mixing time [hh:mm:ss]    | 00:00:30 |
| Mixing speed              | Medium   |
| End of step:              |          |
| Postmix                   | No       |
| Collect count             | 5        |
| Collect time [s]          | 10       |

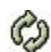

## Mix plate2 C wash5

|                           |                                |
|---------------------------|--------------------------------|
| Plate                     | DECL plate 2 (C) - wash5, PBST |
| Beginning of step:        |                                |
| Precollect                | No                             |
| Release time [hh:mm:ss]   | 00:00:30                       |
| Release speed             | Medium                         |
| Mixing/pause parameters:  |                                |
| Pause for manual handling | No                             |
| Mixing time [hh:mm:ss]    | 00:00:30                       |
| Mixing speed              | Medium                         |
| End of step:              |                                |
| Postmix                   | No                             |
| Collect count             | 5                              |
| Collect time [s]          | 10                             |

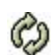

## Mix plate2 D elution

|                           |                                  |
|---------------------------|----------------------------------|
| Plate                     | DECL plate 2 (D) - elution, Tris |
| Beginning of step:        |                                  |
| Precollect                | No                               |
| Release time [hh:mm:ss]   | 00:00:30                         |
| Release speed             | Medium                           |
| Mixing/pause parameters:  |                                  |
| Pause for manual handling | No                               |
| Mixing time [hh:mm:ss]    | 00:03:00                         |
| Mixing speed              | Medium                           |
| End of step:              |                                  |
| Postmix                   | No                               |
| Collect beads             | No                               |

## Layout Data

### Contents

#### DECL plate 1

Tray/plate type

KingFisher plate 200 ul

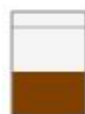

#### A (beads, PBS)

Reagents:

Name

Volume [ $\mu$ l]

Type

beads, PBS

100

Reagent

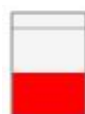

#### B (protein, PBS)

Reagents:

Name

Volume [ $\mu$ l]

Type

protein, PBS

100

Reagent

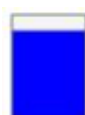

#### C (wash1, PBST-Biotin)

Reagents:

Name

Volume [ $\mu$ l]

Type

PBST-Biotin

200

Reagent



#### D (wash2, PBST-Biotin)

Reagents:

Name

Volume [ $\mu$ l]

Type

PBST-Biotin

200

Reagent

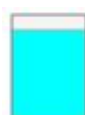

#### E (wash3, PBST)

Reagents:

Name

Volume [ $\mu$ l]

Type

PBST

200

Reagent

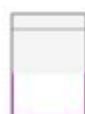

#### F (library, PBST)

Reagents:

Name

Volume [ $\mu$ l]

Type

library, PBST

100

Reagent

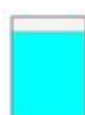

#### G (wash1, PBST)

Reagents:

Name

Volume [ $\mu$ l]

Type

PBST

200

Reagent



#### H (wash2, PBST)

Reagents:

Name

Volume [ $\mu$ l]

PBST

200

## ...H (wash2, PBST)

Type

Reagent

## DECL plate 2

Tray/plate type

KingFisher plate 200 ul

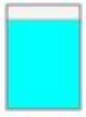

### A (wash3, PBST)

Reagents:

Name

Volume [ $\mu$ l]

Type

PBST

200

Reagent

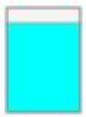

### B (wash4, PBST)

Reagents:

Name

Volume [ $\mu$ l]

Type

PBST

200

Reagent

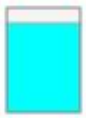

### C (wash5, PBST)

Reagents:

Name

Volume [ $\mu$ l]

Type

PBST

200

Reagent

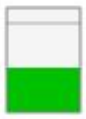

### D (elution, Tris)

Reagents:

Name

Volume [ $\mu$ l]

Type

Tris

100

Reagent

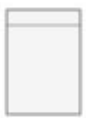

### E

Reagents

<empty>

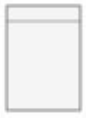

### F

Reagents

<empty>

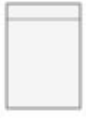

### G

Reagents

<empty>

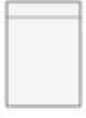

### H

Reagents

<empty>



# Supplementary Note

## ESAC library design

Sub-library A (80 nt)

```
5`-GGAGCTTCTGAATTCTGTGTGCTGAAAAAACGAGTCCCATGGCGCAGCTGCBBBBBBBBCACGGATCCATTTCGATGCAGG-3`  
3`-CCTCGAAGACTTAAGACACACGACdddddGCTCAGGGTACCGCGTCGACGBBBBBBBBGTGCCTAGGTAAGCTACGTCC-5`
```

Sub-library B (80 nt)

## ESAC two-step PCR encoding for Illumina sequencing

### PCR 1

```
IlluminaPCR1a (48 nt) 5`-TACACGACGCTCTCCGATCT11111GGAGCTTCTGAATTCTGTGTG-3`  
IlluminaPCR1b (46 nt) 5`-CAGACGTGTGCTCTCCGATC22222CCTGCATCGAATGGATCCG-3`
```

Sub-library A (80 nt)

```
5`-GGAGCTTCTGAATTCTGTGTGCTGAAAAAACGAGTCCCATGGCGCAGCTGCBBBBBBBBCACGGATCCATTTCGATGCAGG-3`  
                                     <---                                     3`-GCCTAGGTAAGCTACGTCC22222CTAGCCTTCTCGTGTGCAGAC-5`  
                                     IlluminaPCR1b (46 nt)
```

Sub-library A (80 nt)

```
5`-GGAGCTTCTGAATTCTGTGTGCTGAAAAAACGAGTCCCATGGCGCAGCTGCBBBBBBBBCACGGATCCATTTCGATGCAGG-3`  
3`-CCTCGAAGACTTAAGACACACGACAAAAAGCTCAGGGTACCGCGTCGACGBBBBBBBBGTGCCTAGGTAAGCTACGTCC22222CTAGCCTTCTCGTGTGCAGAC-5`
```

Sub-library A + IlluminaPCR1b (107 nt)

IlluminaPCR1a (48 nt)

```
5`-TACACGACGCTCTCCGATCT11111GGAGCTTCTGAATTCTGTGTG-3`                                     --->  
3`-CCTCGAAGACTTAAGACACACGACAAAAAGCTCAGGGTACCGCGTCGACGBBBBBBBBGTGCCTAGGTAAGCTACGTCC22222CTAGCCTTCTCGTGTGCAGAC-5`
```

Sub-library A + IlluminaPCR1b (107 nt)

PCR 1 (134 nt)

```
5`-TACACGACGCTCTCCGATCT11111GGAGCTTCTGAATTCTGTGTGCTGAAAAAACGAGTCCCATGGCGCAGCTGCBBBBBBBBCACGGATCCATTTCGATGCAGG22222GATCGGAAGAGCACACGTCTG-3`  
3`-ATGTGCTGCGAGAAGGCTAGA11111CCTCGAAGACTTAAGACACACGACAAAAAGCTCAGGGTACCGCGTCGACGBBBBBBBBGTGCCTAGGTAAGCTACGTCC22222CTAGCCTTCTCGTGTGCAGAC-5`
```

PCR 1 (134 nt)

## PCR2

IlluminaPCR2a (58 nt) 5`-AATGATACGGCGACCACCGAGATCTACACTCTTTCCCTACACGACGCTCTTCCGATCT-3`  
IlluminaPCR2b (63 nt) 5`-CAAGCAGAAGACGGCATACGAGAT333333GTGACTGGAGTTCAGACGTGTGCTCTTCCGATC-3`

PCR 1 (134 nt)  
5`-TACACGACGCTCTTCCGATCT11111GGAGCTTCTGAATTCTGTGTGCTGAAAAACGAGTCCCATGGCGCAGCTGCCCCCCCCACGGATCCATTTCGATGCAGGATCGGAAAGACACAGCTCTG-3`  
3`-ATGCTGCTGCGAGAAGGCTAGA11111CCTCGAAGACTTAAGACACACGACAAAAAGCTCAGGGTACCCTGCGACCCCCCCCCGTGCCTAGGTAAGCTACGTCCTAGCCTTCTCGTGTGCAGACTTGAGGTCAGT333333TAGAGCATACGGCAGAAGACGAAC-5`  
IlluminaPCR2b (63 nt)

PCR 1 (134 nt)  
5`-TACACGACGCTCTTCCGATCT11111GGAGCTTCTGAATTCTGTGTGCTGAAAAACGAGTCCCATGGCGCAGCTGCCCCCCCCACGGATCCATTTCGATGCAGGATCGGAAAGACACAGCTCTG-3`  
3`-ATGCTGCTGCGAGAAGGCTAGA11111CCTCGAAGACTTAAGACACACGACAAAAAGCTCAGGGTACCCTGCGACCCCCCCCCGTGCCTAGGTAAGCTACGTCCTAGCCTTCTCGTGTGCAGACTTGAGGTCAGT333333TAGAGCATACGGCAGAAGACGAAC-5`  
PCR 1 + IlluminaPCR2b (176 nt)

IlluminaPCR2a (58 nt)  
5`-AATGATACGGCGACCACCGAGATCTACACTCTTTCCCTACACGACGCTCTTCCGATCT-3`  
3`-ATGCTGCTGCGAGAAGGCTAGA11111CCTCGAAGACTTAAGACACACGACAAAAAGCTCAGGGTACCCTGCGACCCCCCCCCGTGCCTAGGTAAGCTACGTCCTAGCCTTCTCGTGTGCAGACTTGAGGTCAGT333333TAGAGCATACGGCAGAAGACGAAC-5`  
PCR 1 + IlluminaPCR2b (176 nt)

PCR 2 (213 nt)  
5`-AATGATACGGCGACCACCGAGATCTACACTCTTTCCCTACACGACGCTCTTCCGATCT11111GGAGCTTCTGAATTCTGTGTGCTGAAAAACGAGTCCCATGGCGCAGCTGCCCCCCCCACGGATCCATTTCGATGCAGGATCGGAAAGACACAGCTCTGAACCTCAGTCAC333333ATCTCGTATGCCGTCTTCTGCTTG-3`  
3`-TTACTATGCCGCTGGTGGCTCTAGATGTGAGAAAGGATGTGCTGCGAGAAGGCTAGA11111CCTCGAAGACTTAAGACACACGACAAAAAGCTCAGGGTACCCTGCGACCCCCCCCCGTGCCTAGGTAAGCTACGTCCTAGCCTTCTCGTGTGCAGACTTGAGGTCAGT333333TAGAGCATACGGCAGAAGACGAAC-5`  
PCR 2 (213 nt)

The C++ program defines the selection and library codes with the symbols x,y,z,\$:

PCR 2 (213 nt)  
5`-AATGATACGGCGACCACCGAGATCTACACTCTTTCCCTACACGACGCTCTTCCGATCTXXXXXXGGAGCTTCTGAATTCTGTGTGCTGAAAAACGAGTCCCATGGCGCAGCTGCCCCCCCCACGGATCCATTTCGATGCAGGATCGGAAAGACACAGCTCTGAACCTCAGTCAC333333ATCTCGTATGCCGTCTTCTGCTTG-3`  
3`-TTACTATGCCGCTGGTGGCTCTAGATGTGAGAAAGGATGTGCTGCGAGAAGGCTAGAXXXXXXCCTCGAAGACTTAAGACACACGACAAAAAGCTCAGGGTACCCTGCGACCCCCCCCCGTGCCTAGGTAAGCTACGTCCTAGCCTTCTCGTGTGCAGACTTGAGGTCAGT333333TAGAGCATACGGCAGAAGACGAAC-5`  
PCR 2 (213 nt)

Code 3 at the 3` end of the library is the indexed code of the TruSeq adapter. It is used for filtering the Illumina data. This is performed by the Illumina software; our C++ program does not use code 3.

## Supplementary Method 2 - Ethanol precipitation

The PCR 2 amplification product is purified by ethanol precipitation after the gel extraction procedure. The ethanol precipitation removes any remaining impurities carried over from the agarose gel and guarantees optimal quality of the DNA solution, which is required for HTDS.

- 1| Pipet the DNA to be purified into a new 2.0 ml reaction tube. Usually, the DNA is present in 40  $\mu$ l Buffer NE (5 mM Tris-HCl, pH 8.5).  
**▲ CRITICAL** 2.0 ml reaction tubes are preferred over 1.5 ml reaction tubes as after the centrifugation steps, it is easier to remove the ethanol from a 2.0 ml tube without impairing the DNA pellet.
- 2| Add 0.1 volume of 3 M sodium acetate pH 4.7. Mix thoroughly.
- 3| Add 3 volumes of 99% Ethanol. Mix thoroughly.
- 4| Incubate at -20 °C for  $\geq$ 1 h.
- 5| Centrifuge at 4°C and  $\geq$ 14.000 g for  $\geq$ 20 min.
- 6| Decant the supernatant carefully.  
**▲ CRITICAL** Pipet very slowly. It is normal to have a very faint or no visible pellet. Avoid touching the area where the pellet is expected with the pipet tip.
- 7| Add 0.5 ml 85% ethanol.
- 8| Centrifuge at 4°C and  $\geq$ 14.000 g for  $\geq$ 20 min.
- 9| Decant the supernatant carefully.
- 10| Air dry pellet.  
**▲ CRITICAL** Make sure no ethanol is left in the tube.
- 11| Resuspend the DNA in 20  $\mu$ l Buffer NE (5 mM Tris-HCl, pH 8.5).
