# Supplementary material
Source: PubMed Central journal article supplement (PMC6126613)
Supplement: NIHMS79202-supplement-Supplementary_materials.pdf [file NIHMS79202-supplement-Supplementary_materials.pdf]

## SUPPLEMENTARY INFORMATION

|                                  |                                                                                                                                                                                                                                                  |
|----------------------------------|--------------------------------------------------------------------------------------------------------------------------------------------------------------------------------------------------------------------------------------------------|
| <b>Supplementary Method 1 </b>   | <b>Protein_biotinylation.pdf</b><br>Protocol for protein biotinylation. A protocol for the chemical biotinylation of target proteins for affinity-based selections.                                                                              |
| <b>Supplementary Software 1 </b> | <b>DECL_selection_5w_KF.msx</b><br>KingFisher program file. It may be adapted upon import into the BindIt software. The BindIt software runs the program on the KingFisher magnetic particle processor.                                          |
| <b>Supplementary Data 1 </b>     | <b>DECL_protocol_report.pdf</b><br>Example of a KingFisher protocol status report. After the KingFisher program ran successfully, the BindIt software provides a protocol status report file, summarizing the course of the run.                 |
| <b>Supplementary Figure 1 </b>   | <b>DECL_oligonucleotide_sequences.pdf</b><br>DECL oligonucleotide sequences. Scheme detailing how two PCR steps introduce selection-specific codes as well as the Illumina TruSeq adapter sequence. The example sequences show the ESAC library. |
| <b>Supplementary Software 2 </b> | <b>count.cpp</b><br>Code of the C++ program “count”. “Count” processes HTDS data using information provided in the structure file and the code lists.                                                                                            |
| <b>Supplementary Software 3 </b> | <b>structure.txt</b><br>Example of a structure file. The structure file provides the C++ program with information about the HTDS data, the code lists as well as the constant regions of the DECL (see <b>Box 2</b> for further information).    |
| <b>Supplementary Software 4 </b> | <b>codelist1.txt</b><br>Example of a code list. The code list contains all the                                                                                                                                                                   |

different sequences used in one of the four coding positions.

**Supplementary Software 5|**

**MATLABscript\_2BB.docx**

MATLAB script 2BB. Selection number and cut-off may be chosen in the highlighted positions. This script provides a 3 dimensional plot for the display of a 2-building block library. Z-axis represents sequence counts.

**Supplementary Software 6|**

**MATLABscript\_3BB.docx**

MATLAB script 3BB. Selection number and cut-off may be chosen in the highlighted positions. This script provides a 3 dimensional plot for the display of a 3-building block library. Dot colour and size represent sequence counts.

**Supplementary Method 2|**

**Ethanol\_precipitation.pdf**

Protocol for ethanol precipitation. A protocol for the ethanol precipitation of DNA for purification purpose. Performed before the DNA sample is submitted to Illumina HTDS.
